# Supplementary material for: Cytokine-induced Expandable Memory NK Cells with Significant Metabolic, Epigenetic Remodeling, and Persistence Properties
Source: Research Square preprint supplement (doi:10.21203/rs.3.rs-8091256/v1), 2025-11-28
Supplement: Supplementary file 1 [file 640dba4f847109f38aad347a.xlsx]

## Sheet: Supplemental tables
Table S1: Antibodies and reagents
Antibodies	Companies	Catalog Numbers	Working Concentration
APC anti-human IFN-γ Antibody	Biolegend	502512	1:100
PE anti-human TNF-α Antibody	Biolegend	502909	1:100
PE anti-human CD107a (LAMP-1) Antibody	Biolegend	328608	1:100
FITC anti-human Perforin	Biolegend	308104	1:100
APC anti-human/mouse Granzyme B Recombinant Antibody	Biolegend	372204	1:100
PE anti-human CD56 (NCAM) Antibody	Biolegend	362508	1:200
FITC anti-human CD56 (NCAM) Antibody	Biolegend	362546	1:200
APC anti-human CD56 (NCAM) Antibody	Biolegend	362504	1:200
PE anti-human CD45 Antibody	Biolegend	304008	1:200
PE anti-human CD3 Antibody	Biolegend	300408	1:200
PE anti-human CD25 Antibody	Biolegend	302606	1:200
PE anti-human CD69 Antibody	Biolegend	310906	1:200
PE anti-human CD314 (NKG2D) Antibody	Biolegend	320806	1:200
APC anti-human CD159a (NKG2A) Antibody	Biolegend	375108	1:200
PE anti-human CD57 Antibody	Biolegend	359612	1:200
PE anti-human CD335 (NKp46) Antibody	Biolegend	331908	1:200
APC anti-human CD337 (NKp30) Antibody	Biolegend	325210	1:200
PE anti-human CD336 (NKp44) Antibody	Biolegend	325108	1:200
APC anti-human CD16 Antibody	Biolegend	302012	1:200
PE anti-human CD158 (KIR2DL1/S1/S3/S5) Antibody	Biolegend	374904	1:200
FITC anti-human CD158b/j (KIR2DL2/L3/S2) Antibody	Biolegend	312604	1:200
FITC anti-human CD158e1 (KIR3DL1) Antibody	Biolegend	312706	1:200
APC anti-human CD71 Antibody	Biolegend	334108	1:50
FITC Mouse IgG1, κ Isotype Ctrl (FC) Antibody	Biolegend	400110	1:200
PE Mouse IgM, κ Isotype Ctrl Antibody	Biolegend	401609	1:200
PE Mouse IgG1, κ Isotype Ctrl Antibody	Biolegend	400112	1:200
FITC Mouse IgG2b, κ Isotype Ctrl Antibody	Biolegend	400310	1:100
APC Mouse IgG1, κ Isotype Ctrl Antibody	Biolegend	400120	1:200
Alexa Fluor™ 488 Rabbit Anti-Human GLUT1	BD	569321	1:50
Alexa Fluor™ 488 Rabbit IgG Isotype Control	BD	569346	1:50
PE Mouse Anti-Human CD98	BD	556077	1:50
PE Mouse IgG1, κ Isotype Control	BD	555749	1:50
Anti-SLC7A5/LAT1 antibody [EPR26260-66]	Abcam	ab305251	1:50
Anti-SLC1A5/ASCT2 antibody [CAL33]	Abcam	ab251591	1:50
Goat Anti-Rabbit IgG H&L / FITC secondary antibody	HZbscience	HZ-0295G	1:200
PE anti-human CD360 (IL-21R) Antibody	Biolegend	359506	1:50
Phospho-Stat1 (Tyr701) (D4A7) Rabbit mAb	CST	7649S	1:50
Phospho-Stat3 (Tyr705) (D3A7) XP® Rabbit mAb	CST	9145S	1:50
Phospho-Stat5 (Tyr694) (D47E7) XP® Rabbit mAb	CST	4322S	1:50
Table S2: Reagents
Reagents		Companies	Catalog Numbers
DH5α Competent Cells		Vazyme	C502-03
FastPure Blood/Cell/Tissue/Bacteria DNA Isolation Mini Kit		Vazyme	DC112-01
Taq™ Hot Start Version		TAKARA	R007A
pGEM®-T Easy Vector		Promega	A1360
EZ DNA methylation-gold kit		ZYMO research	D5005
Sodium pyruvate		Merck	P4562
D-(+)-glucose		Merck	G7021
2-Deoxy-D-glucose		Titan	1027516
Oligomycin		MCE	HY-N6782
FCCP		MCE	HY-100410
Rotenone		MCE	HY-B1756
Antimycin A		MK Bio	MS0070
XFe24 FluxPak mini		Agilent	102342-100
XF RPMI Base Medium		Agilent	103576-100
Poly-D-Lysine		Thermo	A3890401
TRIzol™		Thermo	15596026CN
Sodium acetate (3 M)		Thermo	AM9740
Glycogen (20 mg/mL)		Titan	G8234-500μL
Incucyte® Cytolight Red Reagent		Sartorius	4706
Incucyte® Cytolight Rapid Green Dye		Sartorius	4705
INCB3619 (ADAM inhibitor)		MCE	HY-12636
Dynabeads CD3		Thermo	11151D
HIPP-T009 Lymphocyte Serum-Free Medium		Bioengine	RG0101302
RPMI 1640		Gibco	C22400500BT
NK MACS® Medium, human		Miltenyi	130-114-429
FBS		Gibco	A5256701
UltraGRO		Helios	HPCPLCRL05
GlutaMAX		Thermo	35050061
BD Cytofix Fixation Buffer		BD	554655
BD Perm/Wash Buffer I		BD	557885
TruStain FcX™ PLUS (anti-mouse CD16/32) Antibody		Biolegend	156604
ACK lysis buffer		Gibco	A1049201
Human IFN-γ Broad range ELISA Kit		STARTER	S0C3025
ELISA Flex: Human Perforin (HRP)		MABTECH	3465-1H-6
Human Granzyme B Valukine ELISA Kit		R&D Systems	VAL142
Protein Transport Inhibitor Cocktail (500X)		Thermo	00-4980-03
NK Cell Isolation Kit, human		Miltenyi	130-092-657
NK cell Activation/Expansion Kit		Miltenyi	130-094-483
Recombinant Human IL-2 Protein		PeproTech	200-02-100
Recombinant Human IL-18 Protein		T&L Biotechnology	GMP-TL902
Recombinant Human IL-15 Protein		T&L Biotechnology	GMP-TL202
Recombinant Human IL-21 Protein		T&L Biotechnology	GMP-TL509
Recombinant Human IL-12 Protein		T&L Biotechnology	GMP-TL-508
Anti-human CD16 mAb		T&L Biotechnology	TL201
Urelumab		MCE	HY-P99055
Table S3: Cell lines and mouse model
Cell lines and mouse model	Source		Identifier
K562 cell line	Cell Bank of the Committee on Type Culture Collection, Chinese Academy of Sciences‌		SCSP-5054
Raji cell line	Cell Bank of the Committee on Type Culture Collection, Chinese Academy of Sciences‌		TCH44
THP-1 LUC+ cell line	Immocell		IML-066
NCG immunodeficient mice	GemPharmatech		T001475
Table S4: Primers
Primers	Source	Sequence (5’ to 3’)
CNS1-bisulfite-F1/F2	Sangon Biotech	GGTGTATTAAAATTTTTTGTGGA
CNS1-bisulfite-R1	Sangon Biotech	AATTTCCCTTTTCCTCTATCAT
CNS1-bisulfite-R2	Sangon Biotech	ACAATCACATCCTAACACTCAC
